# Supplementary material for: Switchable coordination bonds in 3D cyano-bridged perovskite ferroelastics: achieving the largest leap of symmetry breaking and enhanced dielectric switching performance
Source: Royal Society of Chemistry journal article supplement (doi:10.1039/d4qi01292e), 2024-01-01
Supplement: d4qi01292e1.pdf [file d4qi01292e1.pdf]

## Electronic Supporting Information

### **Switchable coordination bonds in 3D cyano-bridged perovskite ferroelastics : Achieving the largest leap of symmetry breaking and enhanced dielectric switching performance**

*Sheng-qian Hu, Meng-zhen Li, Zhao-hong Chen, Jun-Si Zhou, Luan-Ying Ji, Yong Ai  
and Xiao-Gang Chen\**

#### **Experimental Section**

*Preparation of FAZT-K.* All chemicals were commercially available and were used without further purification. 3-fluoroazetidine hydrochloride (1.6731 g, 15 mmol) was added to 20 ml aqueous solution of  $\text{K}_3\text{Fe}(\text{CN})_6$  (1.6463 g, 5 mmol). The solution was placed in a fume hood with tin foil wrapped to avoid light treatment. After slowly evaporating at room temperature for ten days, we obtained reddish-brown block crystals FAZT-K.

*Preparation of AZT-K.* All chemicals were commercially available and were used without further purification. Azetidine hydrochloride (1.4034 g, 15 mmol) was added to 70 ml aqueous solution of  $\text{K}_3\text{Fe}(\text{CN})_6$  (1.6463 g, 5 mmol). The solution was placed in a fume hood with tin foil wrapped to avoid light treatment. After slowly evaporating at room temperature for over 3 weeks, we obtained reddish-brown block crystals AZT-K.

*Preparation of FAZT-Rb.* All chemicals except  $\text{Ag}_3\text{Fe}(\text{CN})_6$  were commercially available and were used without further purification.  $\text{Ag}_3\text{Fe}(\text{CN})_6$  is obtained by collecting the filter residue after the reaction of  $\text{K}_3\text{Fe}(\text{CN})_6$  and silver nitrate in the

aqueous solution. 3-fluoroazetidine hydrochloride (1.6731 g, 15 mmol) was added to the solution of  $\text{Rb}_3\text{Fe}(\text{CN})_6$  which is obtained by filtration after the reaction of  $\text{Ag}_3\text{Fe}(\text{CN})_6$  (2.6778 g, 5 mmol) and rubidium chloride (1.8138 g, 15 mmol) in 20 ml aqueous solution. The solution was placed in a fume hood with tin foil wrapped to avoid light treatment. After slowly evaporating at room temperature for ten days, we obtained reddish-brown block crystals FAZT-Rb.

*Preparation of AZT-Rb.* All chemicals except  $\text{Ag}_3\text{Fe}(\text{CN})_6$  were commercially available and were used without further purification.  $\text{Ag}_3\text{Fe}(\text{CN})_6$  is obtained by collecting the filter residue after the reaction of  $\text{K}_3\text{Fe}(\text{CN})_6$  and silver nitrate in the aqueous solution. Azetidine hydrochloride (1.4034 g, 15 mmol) was added to the solution of  $\text{Rb}_3\text{Fe}(\text{CN})_6$  which is obtained by filtration after the reaction of  $\text{Ag}_3\text{Fe}(\text{CN})_6$  (2.6778 g, 5 mmol), and rubidium chloride (1.8138 g, 15 mmol) in 20 ml aqueous solution. The solution was placed in a fume hood with tin foil wrapped to avoid light treatment. After slowly evaporating at room temperature for eight days, we obtained reddish-brown block crystals AZT-Rb.

*Preparation of FAZT-Cs.* All chemicals except  $\text{Ag}_3\text{Fe}(\text{CN})_6$  were commercially available and were used without further purification.  $\text{Ag}_3\text{Fe}(\text{CN})_6$  is obtained by collecting the filter residue after the reaction of  $\text{K}_3\text{Fe}(\text{CN})_6$  and silver nitrate in the aqueous solution. 3-fluoroazetidine hydrochloride (1.673 g, 15 mmol) was added to the solution of  $\text{Cs}_3\text{Fe}(\text{CN})_6$  which is obtained by filtration after the reaction of  $\text{Ag}_3\text{Fe}(\text{CN})_6$  (2.6778 g, 5 mmol) and cesium chloride (2.5354 g, 15 mmol) in 20 ml aqueous solution. The solution was placed in a fume hood with tin foil wrapped to avoid light treatment.

After slowly evaporating at room temperature for eight days, we obtained reddish-brown block crystals FAZT-Cs.

*Preparation of AZT-Cs.* All chemicals except  $\text{Ag}_3\text{Fe}(\text{CN})_6$  were commercially available and were used without further purification.  $\text{Ag}_3\text{Fe}(\text{CN})_6$  is obtained by collecting the filter residue after the reaction of  $\text{K}_3\text{Fe}(\text{CN})_6$  and silver nitrate in the aqueous solution. Azetidine hydrochloride (1.4034 g, 15 mmol) was added to the solution of  $\text{Cs}_3\text{Fe}(\text{CN})_6$  which is obtained by filtration after the reaction of  $\text{Ag}_3\text{Fe}(\text{CN})_6$  (2.6778 g, 5 mmol) and cesium chloride (2.5354 g, 15 mmol) in 20 ml aqueous solution. The solution was placed in a fume hood with tin foil wrapped to avoid light treatment. After slowly evaporating at room temperature for a week, we obtained reddish-brown block crystals AZT-Cs.

*Characterizations:*

*TGA measurements:* About 5 mg of dried and ground powder is placed in a small crucible to make a sample. The thermal stability of samples was investigated on a Perkin Elmer TGA8000 thermal gravimetric analyzer with a rate of 40 K/min. The measurement temperature range was from 300 K to 873 K.

*Powder X-ray diffraction:* The dried and ground powder was filled into the groove of the glass slide to make a sample. Room-temperature powder X-ray diffraction (PXRD) data were collected by using a Rigaku D/MAX 2000 PC X-ray diffraction system with  $\text{Cu K}\alpha$  radiation in the  $2\theta$  range of  $10^\circ$ - $50^\circ$  with a step size of  $0.02^\circ$ , and the scan speed is  $10^\circ/\text{min}$ .

*DSC measurements:* About 5 mg of dried and ground powder is placed in an aluminum crucible to make a sample. Differential scanning calorimetry (DSC) measurements were recorded on a Perkin-Elmer Diamond DSC instrument by heating and cooling powder samples with a rate of 20 K/min in a nitrogen atmosphere.

*Dielectric measurements:* The samples were made with pressed powder pellets with a thickness of about 4 mm. The samples were coated with silver conducting glue on both sides with an area of about 12 mm<sup>2</sup>. The samples were fixed on the hexagonal electrode by copper wires which were stuck on both sides of the samples with silver glue. Dielectric measurements were measured with a TH2828A impedance analyzer at 1 MHz. The heating and cooling rate was about 6 K/min, the applied voltage was 1V. For dielectric switching measurements, the response time of one dielectric switch is about 15 minutes, and the total cycle time is about 80 minutes.

*Single crystal X-ray crystallography:* The transparent crack-free single crystal was selected as the measurement sample under the microscope. Single-crystal X-ray diffraction measurements of all compounds were performed on the Rigaku XtaLAB Synergy-DW diffractometer with Cu-K $\alpha$  radiation ( $\lambda = 1.54184 \text{ \AA}$ ) at various temperatures. Rigaku Crystal Clear 1.3.5 was used for data collection, cell refinement, and data reduction.

*Optical microscopy measurements:* A thin film was obtained by evaporating 20  $\mu\text{L}$  of 10 mg/mL of aqueous solution of the measured compounds on sheet glass with an area of 1 cm<sup>2</sup> on a hot stage of 323 K. Ferroelastic domain observations were carried out

using an OLYMPUS BX53-P polarizing microscope. The temperature was controlled by a Linkam LTS420 cooling/heating stage with a rate of 10 K/min.

[CCDC 2352607-2352619 contains the supplementary crystallographic data for this paper. These data can be obtained free of charge from The Cambridge Crystallographic Data Centre via [www.ccdc.cam.ac.uk/data\\_request/cif](http://www.ccdc.cam.ac.uk/data_request/cif).]

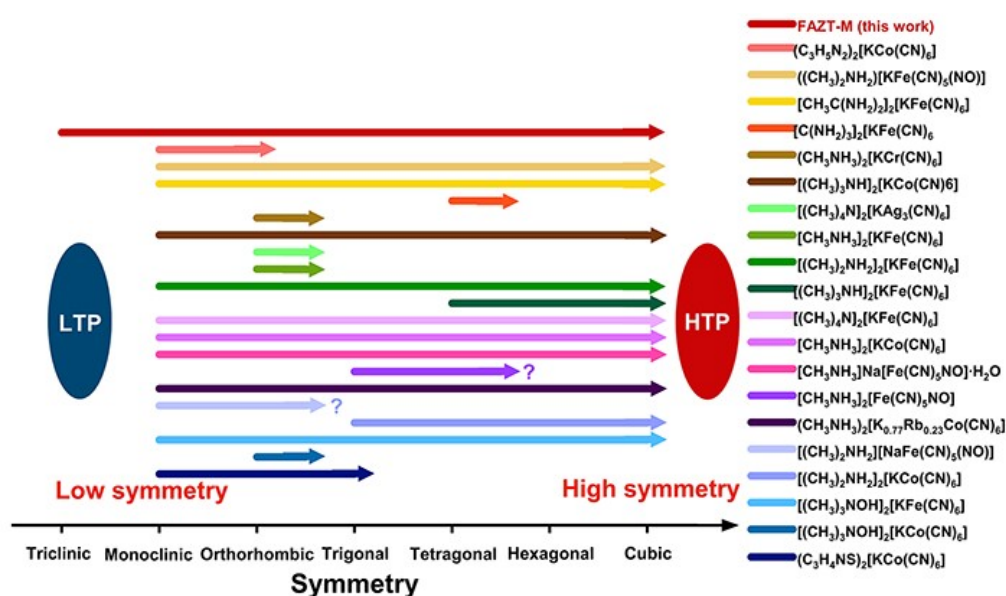

**Figure S1.** Symmetry change of FAZT-M between LTP and HTP compare to other 3D cyano-bridged perovskites.

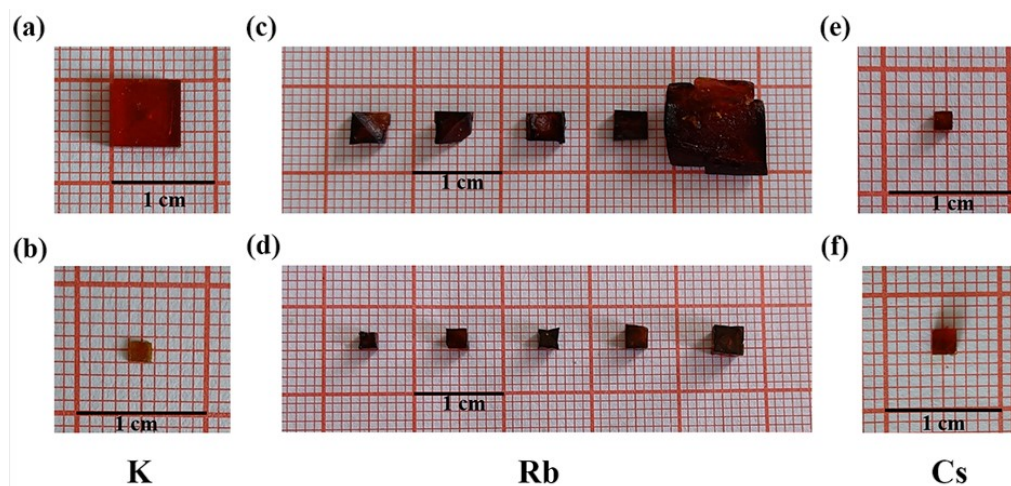

**Figure S2.** Crystal morphology of FAZT-K (a), AZT-K (b), FAZT-Rb (c), AZT-Rb (d), FAZT-Cs (e) and AZT-Cs (f).

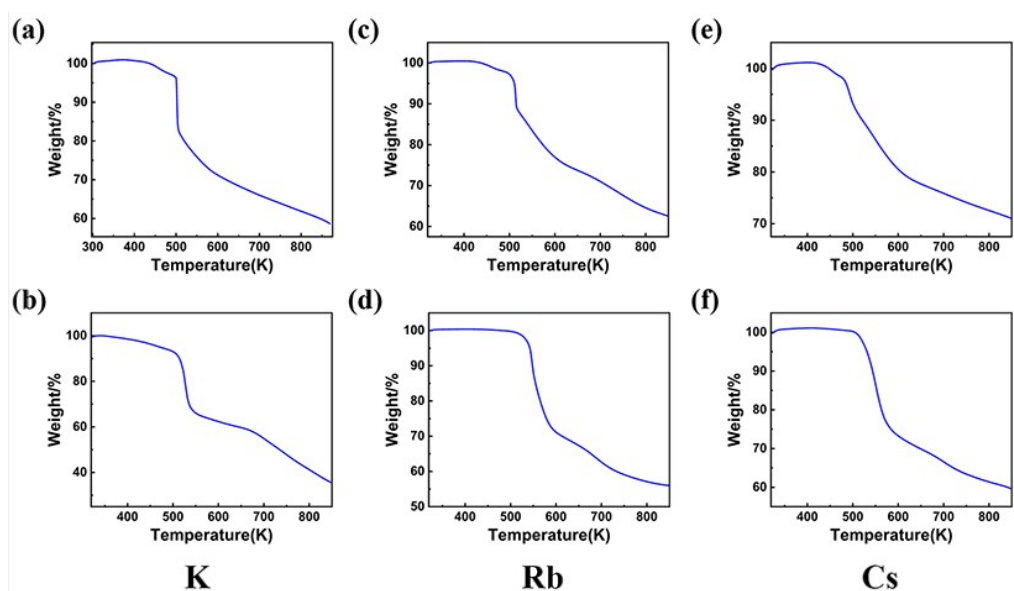

**Figure S3.** TGA curves of FAZT-K (a), AZT-K (b), FAZT-Rb (c), AZT-Rb (d), FAZT-Cs (e) and AZT-Cs (f).

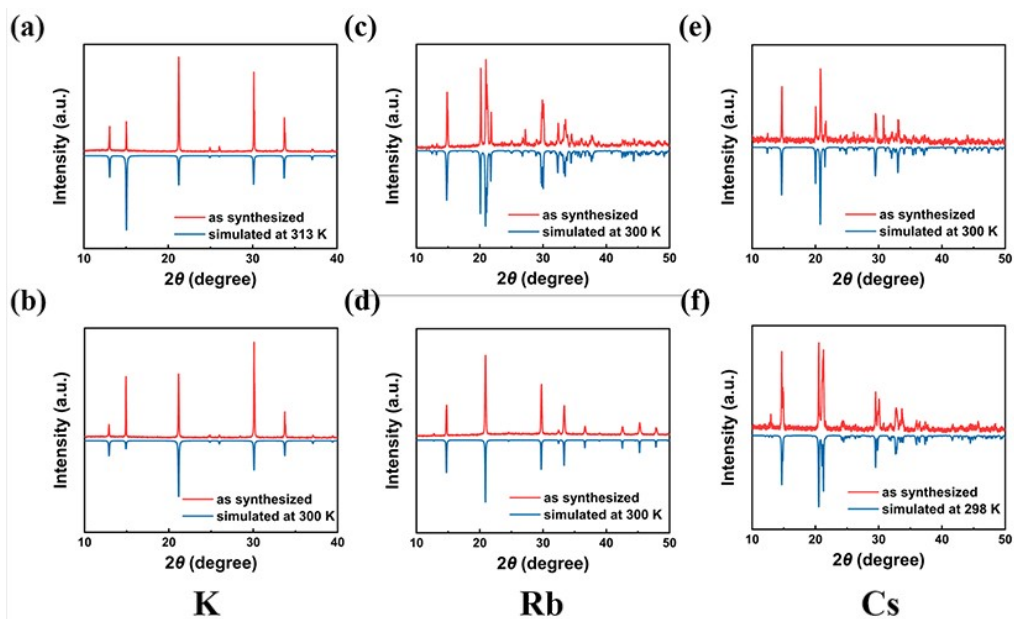

**Figure S4.** The PXRD patterns confirmed the phase purity of the as-synthesized sample for FAZT-K (a), AZT-K (b), FAZT-Rb (c), AZT-Rb (d), FAZT-Cs (e) and AZT-Cs (f).

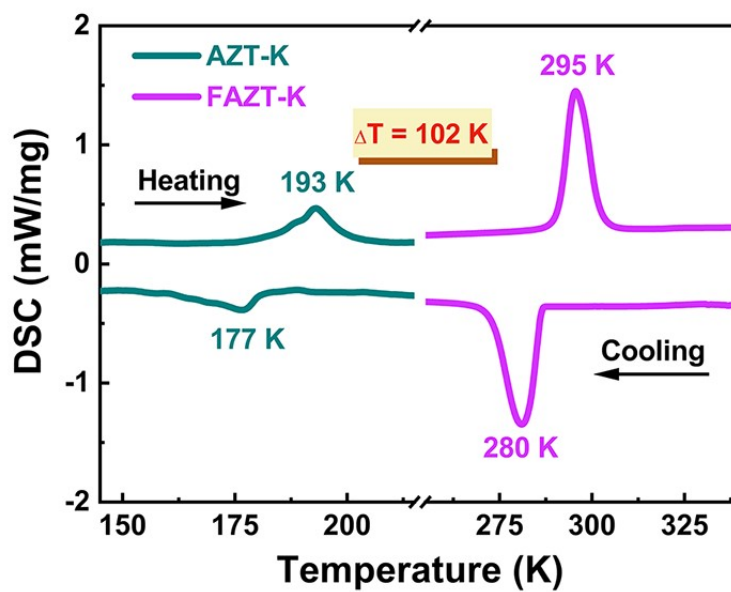

**Figure S5.** DSC curves of FAZT-K and AZT-K.

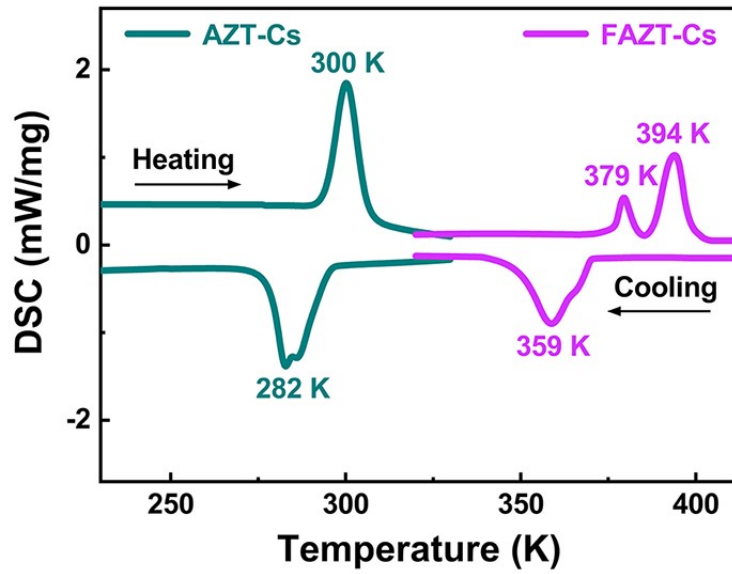

**Figure S6.** DSC curves of FAZT-Cs and AZT-Cs.

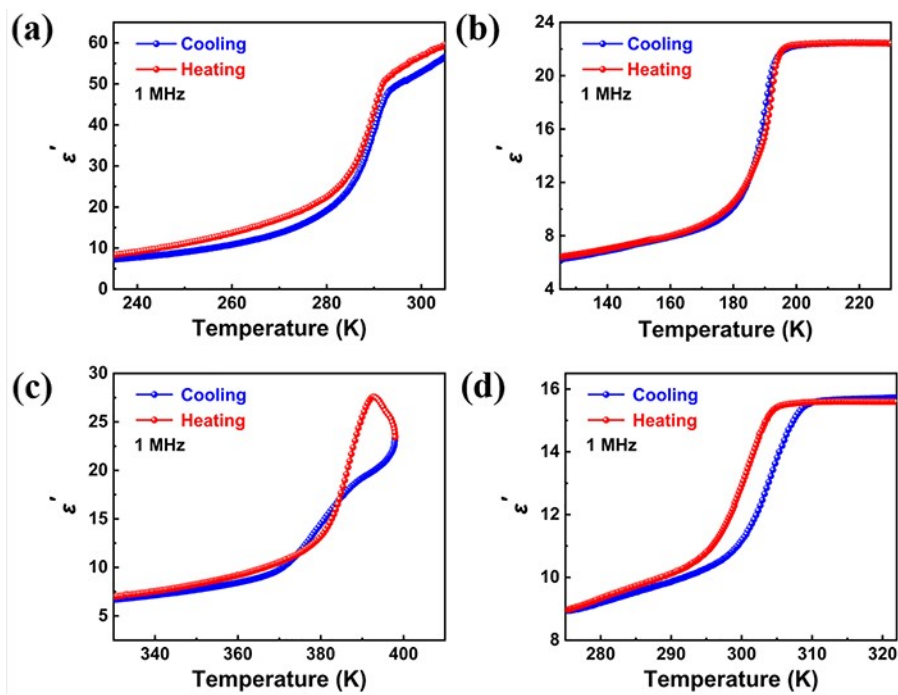

**Figure S7.** Temperature-dependent dielectric constants of FAZT-K (a), AZT-K (b), FAZT-Cs (c), and AZT-Cs (d).



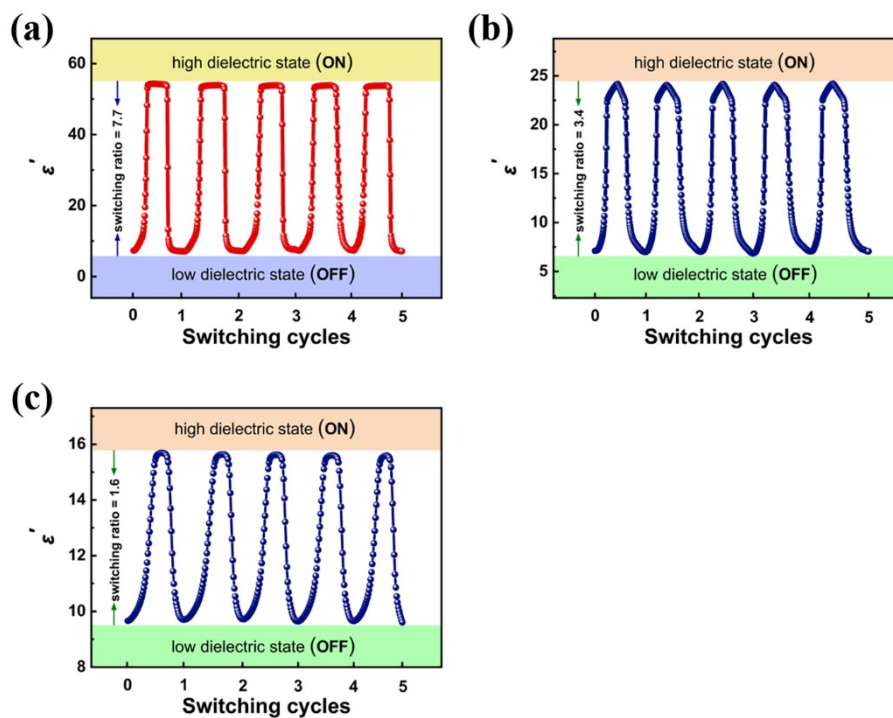

**Figure S8.** Reversible dielectric switching (ON and OFF) of  $\epsilon'$  between HTP and LTP measured for FAZT-K (a), AZT-K (b), and AZT-Cs (c) at 1 MHz.

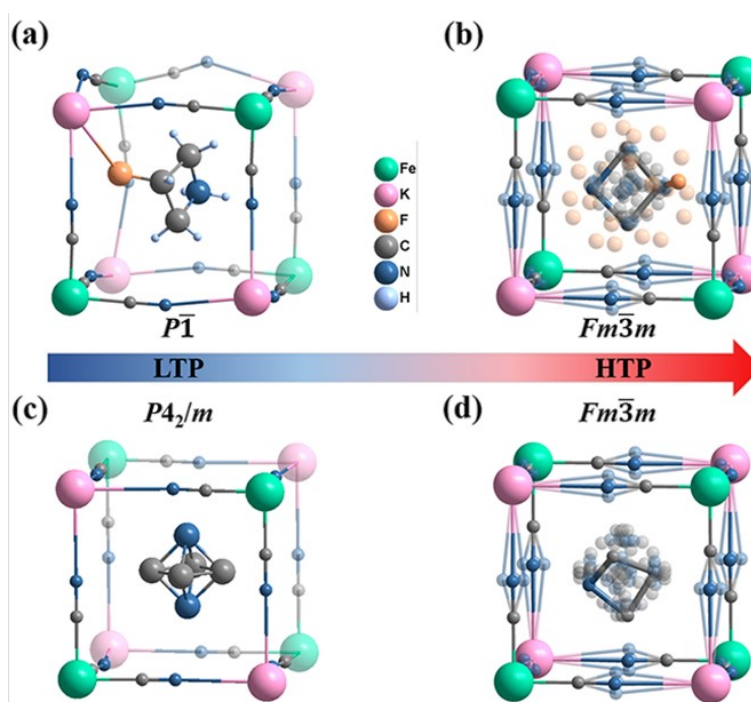

**Figure S9.** Crystal structures of FAZT-K and AZT-K. The basic unit of the framework in LTP and HTP of FAZT-K (a), (b), and AZT-K (c), (d). The hydrogen atoms in the HTP and of AZT-K in the LTP are omitted for clarity.

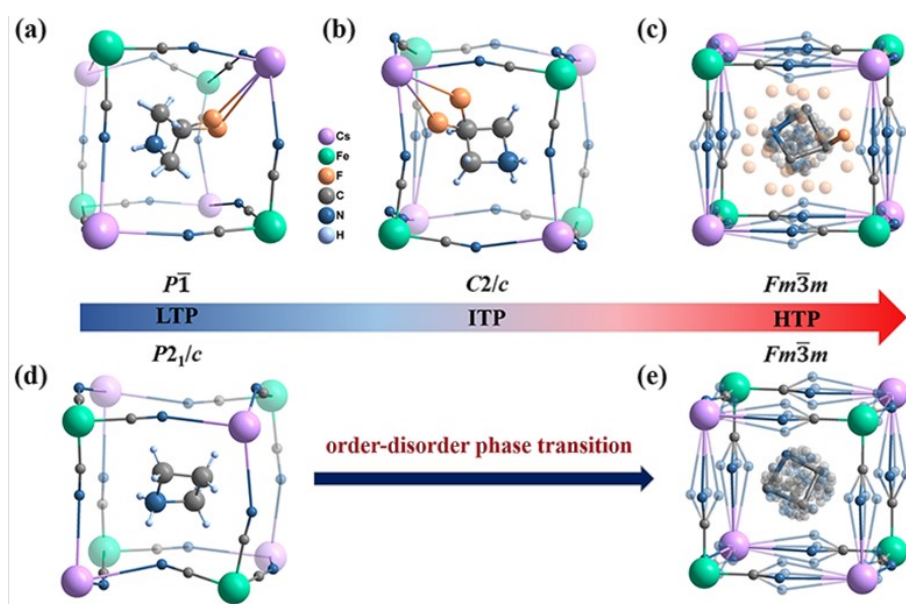

**Figure S10.** Crystal structures of FAZT-Cs and AZT-Cs. The basic unit of the framework in LTP, ITP, and HTP of FAZT-Cs (a), (b), (c), and AZT-Cs (d), (e). The hydrogen atoms in the HTP are omitted for clarity.

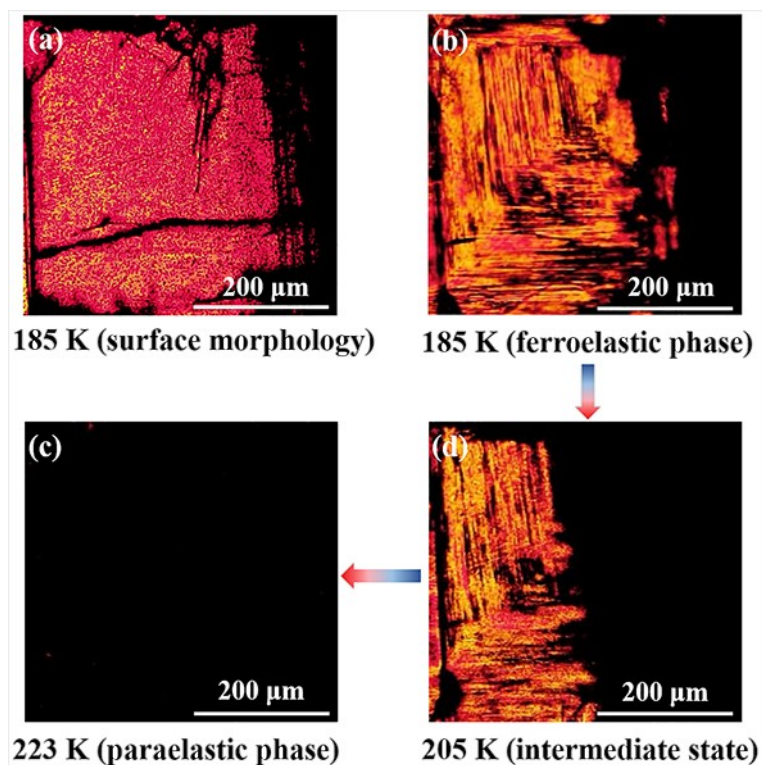

**Figure S11.** Evolution of ferroelastic domains between the ferroelastic phase and paraelastic phase for AZT-Rb.

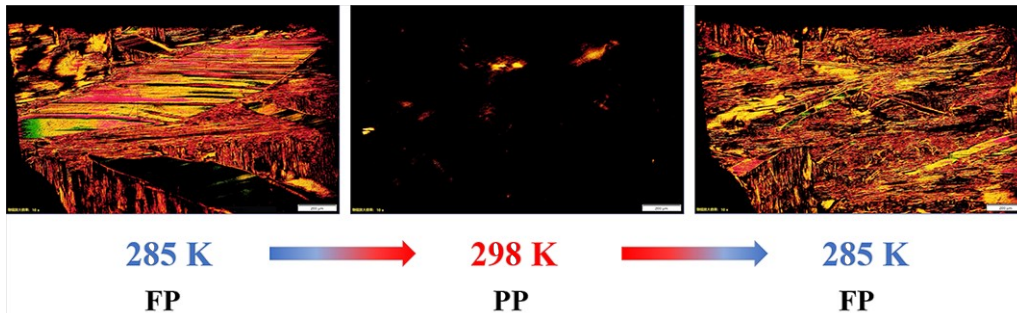

**Figure S12.** Evolution of ferroelastic domains repeatedly cycling between the ferroelastic phase (FP) and paraelastic phases (PP) for FAZT-K.

**Table S1.** Space groups and  $T_c$  of other 3D cyano-bridged perovskites mentioned in Figure S1 in the HTP and LTP, respectively.

|                                               | space group<br>in the LTP | space group<br>in the HTP | $T_c$ / K   |
|-----------------------------------------------|---------------------------|---------------------------|-------------|
| $(C_5H_5N_2)_2[KCo(CN)_6]^1$                  | $C2/c$                    | $R\bar{3}m$               | 110/198     |
| $((CH_3)_2NH_2)[KFe(CN)_5(NO)]^2$             | $P2_12_12_1$              | $Pnma$                    | 297         |
| $[CH_3C(NH_2)_2]_2[KFe(CN)_6]^3$              | $C2/m$                    | $Fm\bar{3}m$              | 201/385     |
| $[C(NH_2)_3]_2[KFe(CN)_6]^4$                  | $R\bar{3}c$               | $Fm\bar{3}m$              | 411/439     |
| $(CH_3NH_3)_2[KCr(CN)_6]^5$                   | $C2/c$                    | ?                         | 450         |
| $[(CH_3)_3NH]_2[KCo(CN)_6]^6$                 | $C2/c$                    | $Fm\bar{3}m$              | 350         |
| $[(CH_3)_4N]_2[KAg_3(CN)_6]^7$                | $R\bar{3}c$               | ?                         | ?           |
| $[CH_3NH_3]_2[KFe(CN)_6]^8$                   | $C2/c$                    | $Fm\bar{3}m$              | 429         |
| $[(CH_3)_2NH_2]_2[KFe(CN)_6]^8$               | $C2/c$                    | $Fm\bar{3}m$              | 226         |
| $[(CH_3)_3NH]_2[KFe(CN)_6]^8$                 | $C2/c$                    | $Fm\bar{3}m$              | 316         |
| $[(CH_3)_4N]_2[KFe(CN)_6]^8$                  | $I4/m$                    | $Fm\bar{3}m$              | 350         |
| $[CH_3NH_3]_2[KCo(CN)_6]^9$                   | $C2/c$                    | $Fm\bar{3}m$              | 421         |
| $[CH_3NH_3]Na[Fe(CN)_5NO] \cdot H_2O^1_0$     | $Pbcm$                    | $Cmcm$                    | 229/238     |
| $[CH_3NH_3]_2[Fe(CN)_5NO]^{10}$               | $Pbcm$                    | $Cmcm$                    | 207/211/223 |
| $(CH_3NH_3)_2[K_{0.77}Rb_{0.23}Co(CN)_6]^1_1$ | $C2/c$                    | $Fm\bar{3}m$              | 435         |
| $[(CH_3)_2NH_2][NaFe(CN)_5(NO)]^{12}$         | $Pna2_1$                  | $Pnma$                    | 423         |
| $[(CH_3)_2NH_2]_2[KCo(CN)_6]^{13}$            | $P4/mnc$                  | $P4/mnc$                  | 245         |
| $[(CH_3)_3NOH]_2[KFe(CN)_6]^{14}$             | $Cc$                      | $Fm\bar{3}m$              | 402         |
| $[(CH_3)_3NOH]_2[KCo(CN)_6]^{15}$             | $Cc$                      | $Fm\bar{3}m$              | 417         |
| $(C_3H_4NS)_2[KCo(CN)_6]^{16}$                | Monoclinic                | $Cmcm$                    | 210/237     |

**Table S2.** The crystal data for compounds FAZT-Rb and AZT-Rb at different temperatures.

|                                                  | [C <sub>3</sub> H <sub>6</sub> NHF] <sub>2</sub> [RbFe(CN) <sub>6</sub> ] |              | [C <sub>3</sub> H <sub>6</sub> NH <sub>2</sub> ] <sub>2</sub> [RbFe(CN) <sub>6</sub> ] |              |
|--------------------------------------------------|---------------------------------------------------------------------------|--------------|----------------------------------------------------------------------------------------|--------------|
| Formula weight                                   | 449.63                                                                    | 899.26       | 413.65                                                                                 | 827.29       |
| Temperature/K                                    | 300                                                                       | 373          | 173                                                                                    | 300          |
| Crystal system                                   | triclinic                                                                 | cubic        | monoclinic                                                                             | cubic        |
| Space group                                      | $P\bar{1}$                                                                | $Fm\bar{3}m$ | $P2_1/c$                                                                               | $Fm\bar{3}m$ |
| a/Å                                              | 8.1709(6)                                                                 | 12.08650(10) | 14.0338(4)                                                                             | 12.0140(2)   |
| b/Å                                              | 8.5006(6)                                                                 | 12.08650(10) | 8.5636(3)                                                                              | 12.0140(2)   |
| c/Å                                              | 14.7072(5)                                                                | 12.08650(10) | 14.7882(4)                                                                             | 12.0140(2)   |
| $\alpha/^\circ$                                  | 104.555(4)                                                                | 90           | 90                                                                                     | 90           |
| $\beta/^\circ$                                   | 90.341(5)                                                                 | 90           | 110.417(3)                                                                             | 90           |
| $\gamma/^\circ$                                  | 118.608(7)                                                                | 90           | 90                                                                                     | 90           |
| Volume/Å <sup>3</sup>                            | 858.39(11)                                                                | 1765.64(4)   | 1665.59(9)                                                                             | 1734.06(9)   |
| Z                                                | 2                                                                         | 2            | 4                                                                                      | 2            |
| $\mu/\text{mm}^{-1}$                             | 10.780                                                                    | 10.482       | 10.873                                                                                 | 3.667        |
| $\rho_{\text{calc}}/\text{g}\cdot\text{cm}^{-3}$ | 1.740                                                                     | 1.691        | 1.650                                                                                  | 1.584        |
| $R_{\text{int}}$                                 | 0.0632                                                                    | 0.0324       | 0.0740                                                                                 | 0.0153       |
| $R_1 [I \geq 2\sigma(I)]$                        | 0.0880                                                                    | 0.0313       | 0.0987                                                                                 | 0.0263       |
| $wR_2 [I \geq 2\sigma(I)]$                       | 0.2616                                                                    | 0.0955       | 0.2774                                                                                 | 0.0554       |
| $R_1$ [all data]                                 | 0.0954                                                                    | 0.0313       | 0.1064                                                                                 | 0.0282       |
| $wR_2$ [all data]                                | 0.2676                                                                    | 0.0955       | 0.2810                                                                                 | 0.0564       |
| Goodness-of-fit on $F^2$                         | 1.080                                                                     | 1.168        | 1.153                                                                                  | 1.014        |

**Table S3.** Selected bond lengths [ $\text{\AA}$ ] for FAZT-Rb and AZT-Rb.

| Phase          | Fe-C      | Rb-N      | C-N       |
|----------------|-----------|-----------|-----------|
| LTP in FAZT-Rb | 1.916(10) | 3.145(9)  | 1.173(13) |
|                | 1.915(10) | 2.961(8)  | 1.141(11) |
|                | 1.955(8)  | 2.971(8)  | 1.127(11) |
|                | 1.955(8)  | 3.182(8)  | 1.139(12) |
|                | 1.948(8)  | 3.083(9)  | 1.138(12) |
|                | 1.948(8)  | 3.188(9)  | 1.139(12) |
| HTP in FAZT-Rb | 1.916(6)  | 3.030(7)  | 1.198(10) |
| LTP in AZT-Rb  | 1.939(8)  | 3.013(8)  | 1.145(11) |
|                | 1.939(9)  | 2.954(9)  | 1.145(13) |
|                | 1.969(9)  | 2.971(8)  | 1.150(12) |
|                | 1.969(9)  | 2.986(8)  | 1.156(12) |
|                | 1.945(9)  | 3.028(8)  | 1.168(12) |
|                | 1.945(9)  | 3.000(9)  | 1.136(13) |
| HTP in AZT-Rb  | 1.925(7)  | 2.957(10) | 1.201(11) |

**Table S4.** Selected bond angles [ $^\circ$ ] for FAZT-Rb and AZT-Rb.

| Phase          | C-Fe-C    |         | N-Rb-N    |           | Rb-N-C    | N-C-Fe    |
|----------------|-----------|---------|-----------|-----------|-----------|-----------|
| LTP in FAZT-Rb | 94.0(4)   | 90.2(3) | 126.3(3)  | 71.9(2)   | 145.0(8)  | 175.2(9)  |
|                | 94.0(4)   | 90.2(3) | 76.6(3)   | 95.4(3)   | 167.7(8)  | 178.3(8)  |
|                | 86.0(4)   | 89.7(4) | 89.0(3)   | 80.0(2)   | 169.0(8)  | 179.6(8)  |
|                | 86.0(4)   | 90.3(4) | 79.4(2)   | 109.0(3)  | 153.2(8)  | 177.7(10) |
|                | 89.8(3)   | 89.7(4) | 83.4(3)   | 84.4(2)   | 141.8(8)  | 174.8(9)  |
|                | 89.8(3)   | 90.3(4) | 91.1(3)   | 83.3(3)   | 144.1(7)  | 176.4(8)  |
| HTP in FAZT-Rb | 90.0      |         | 88.95(10) | 91.05(10) | 152.1(12) | 159.9(9)  |
|                |           |         | 82.3(4)   | 105.6(7)  |           |           |
|                |           |         | 97.7(4)   | 105.6(7)  |           |           |
| LTP in AZT-Rb  | 89.9(3)   | 93.6(3) | 72.3(2)   | 107.7(2)  | 151.7(7)  | 178.0(8)  |
|                | 93.6(3)   | 86.4(3) | 97.3(2)   | 78.4(2)   | 166.6(8)  | 179.1(8)  |
|                | 91.6(4)   | 87.0(3) | 84.7(2)   | 87.2(2)   | 150.1(8)  | 175.9(8)  |
|                | 90.1(3)   | 87.0(3) | 99.2(2)   | 100.5(2)  | 156.7(7)  | 175.2(9)  |
|                | 93.6(3)   | 93.0(3) | 104.0(2)  | 68.0(2)   | 155.7(7)  | 178.0(8)  |
|                | 86.4(3)   | 93.0(3) | 90.6(2)   | 88.5(2)   | 145.8(8)  | 178.3(8)  |
| HTP in AZT-Rb  | 90.000(1) |         | 89.16(5)  | 103.9(4)  | 155.6(7)  | 162.6(5)  |
|                |           |         | 83.08(19) | 90.84(5)  |           |           |
|                |           |         | 96.92(19) | 76.1(4)   |           |           |

**Table S5.** The crystal data for compounds FAZT-K and AZT-K at different temperatures.

|                                                  | [C <sub>3</sub> H <sub>6</sub> NHF] <sub>2</sub> [KFe(CN) <sub>6</sub> ] |              | [C <sub>3</sub> H <sub>6</sub> NH <sub>2</sub> ] <sub>2</sub> [KFe(CN) <sub>6</sub> ] |              |
|--------------------------------------------------|--------------------------------------------------------------------------|--------------|---------------------------------------------------------------------------------------|--------------|
| Formula weight                                   | 403.26                                                                   | 806.52       | 351.15                                                                                | 734.55       |
| Temperature/K                                    | 260                                                                      | 313          | 93                                                                                    | 300          |
| Crystal system                                   | triclinic                                                                | cubic        | tetragonal                                                                            | cubic        |
| Space group                                      | $P\bar{1}$                                                               | $Fm\bar{3}m$ | $P4_2/m$                                                                              | $Fm\bar{3}m$ |
| a/Å                                              | 8.0909(5)                                                                | 11.9496(6)   | 8.3464(11)                                                                            | 11.8711(3)   |
| b/Å                                              | 8.4371(6)                                                                | 11.9496(6)   | 8.3464(11)                                                                            | 11.8711(3)   |
| c/Å                                              | 14.3951(6)                                                               | 11.9496(6)   | 11.807(3)                                                                             | 11.8711(3)   |
| $\alpha/^\circ$                                  | 104.053(5)                                                               | 90           | 90                                                                                    | 90           |
| $\beta/^\circ$                                   | 90.862(4)                                                                | 90           | 90                                                                                    | 90           |
| $\gamma/^\circ$                                  | 118.541(7)                                                               | 90           | 90                                                                                    | 90           |
| Volume/Å <sup>3</sup>                            | 827.45(10)                                                               | 1706.3(3)    | 822.5(3)                                                                              | 1672.91(13)  |
| Z                                                | 2                                                                        | 2            | 2                                                                                     | 2            |
| $\mu/\text{mm}^{-1}$                             | 9.878                                                                    | 1.160        | 9.693                                                                                 | 9.534        |
| $\rho_{\text{calc}}/\text{g}\cdot\text{cm}^{-3}$ | 1.619                                                                    | 1.570        | 1.418                                                                                 | 1.458        |
| $R_{\text{int}}$                                 | 0.0676                                                                   | 0.0128       | 0.0247                                                                                | 0.0064       |
| $R_1 [I \geq 2\sigma(I)]$                        | 0.0903                                                                   | 0.0348       | 0.1240                                                                                | 0.0372       |
| $wR_2 [I \geq 2\sigma(I)]$                       | 0.2402                                                                   | 0.1176       | 0.2921                                                                                | 0.0812       |
| $R_1$ [all data]                                 | 0.1103                                                                   | 0.0356       | 0.1311                                                                                | 0.0372       |
| $wR_2$ [all data]                                | 0.2587                                                                   | 0.1216       | 0.2970                                                                                | 0.0812       |
| Goodness-of-fit on $F^2$                         | 1.091                                                                    | 0.923        | 1.095                                                                                 | 1.076        |

**Table S6.** Selected bond lengths [Å] for FAZT-K and AZT-K.

| Phase         | Fe-C      | K-N       |           | C-N       |
|---------------|-----------|-----------|-----------|-----------|
| LTP in FAZT-K | 1.941(5)  | 2.845(6)  |           | 1.159(8)  |
|               | 1.946(6)  | 3.077(6)  |           | 1.144(7)  |
|               | 1.948(6)  | 3.066(6)  |           | 1.149(7)  |
|               | 1.948(6)  | 2.955(5)  |           | 1.165(8)  |
|               | 1.948(5)  | 2.851(5)  |           | 1.145(8)  |
|               | 1.949(5)  | 3.053(6)  |           | 1.143(8)  |
| HTP in FAZT-K | 1.937(5)  | 2.931(5)  |           | 1.178(8)  |
| LTP in AZT-K  | 1.939(15) | 3.003(19) | 2.86(2)   | 1.08(2)   |
|               | 1.867(15) | 2.888(14) | 2.86(2)   | 1.025(17) |
|               | 2.001(14) | 2.888(14) | 3.003(19) | 1.10(2)   |
| HTP in AZT-K  | 1.940(4)  | 2.882(5)  |           | 1.174(7)  |

**Table S7.** Selected bond angles [°] for FAZT-K and AZT-K.

| Phase         | C-Fe-C    |          | N-K-N      |            | K-N-C     | N-C-Fe    |
|---------------|-----------|----------|------------|------------|-----------|-----------|
| LTP in FAZT-K | 92.8(2)   | 91.5(2)  | 78.10(16)  | 91.71(17)  | 158.8(5)  | 176.9(5)  |
|               | 87.2(2)   | 88.5(2)  | 83.68(16)  | 82.02(17)  | 146.8(5)  | 177.3(5)  |
|               | 87.2(2)   | 93.5(2)  | 84.49(16)  | 124.77(17) | 169.2(5)  | 179.2(5)  |
|               | 92.8(2)   | 86.5(2)  | 108.54(16) | 83.11(17)  | 170.4(5)  | 174.7(5)  |
|               | 88.5(2)   | 86.5(2)  | 73.29(17)  | 90.81(18)  | 146.3(5)  | 175.6(6)  |
|               | 91.5(2)   | 93.5(2)  | 93.29(17)  | 77.06(17)  | 120.4(4)  | 177.5(5)  |
| HTP in FAZT-K | 90.0      |          | 89.21(7)   | 103.5(6)   | 156.3(10) | 163.0(7)  |
|               |           |          | 83.3(3)    | 96.7(3)    |           |           |
|               |           |          | 90.79(7)   | 76.5(6)    |           |           |
| LTP in AZT-K  | 90.00(1)  | 90.00(2) | 90.00(1)   | 90         | 180.0     | 180.0     |
|               | 90.00(1)  | 90.00(2) | 90.00(1)   | 90.00(1)   |           |           |
|               | 90.00(1)  | 82.4(5)  | 90.00(1)   | 79.8(4)    | 161.9(14) | 172.5(15) |
|               | 90.00(1)  | 82.4(5)  | 90.00(1)   | 100.2(4)   |           |           |
|               | 90.00(1)  | 97.6(5)  | 90         | 79.8(4)    | 173.4(13) | 179.4(13) |
|               | 90.00(1)  | 97.6(5)  | 90.00(1)   | 100.2(4)   |           |           |
| HTP in AZT-K  | 90.000(1) |          | 89.999(1)  | 83.8(2)    | 158.4(7)  | 164.6(5)  |
|               |           |          | 102.4(4)   | 90.001(1)  |           |           |
|               |           |          | 90.67(5)   | 89.33(5)   |           |           |



**Table S8.** The crystal data for compounds FAZT-Cs and AZT-Cs at different temperatures.

|                                                     | [C <sub>3</sub> H <sub>6</sub> NHF] <sub>2</sub> [CsFe(CN) <sub>6</sub> ] |             |              | [C <sub>3</sub> H <sub>6</sub> NH <sub>2</sub> ] <sub>2</sub> [CsFe(CN) <sub>6</sub> ] |              |
|-----------------------------------------------------|---------------------------------------------------------------------------|-------------|--------------|----------------------------------------------------------------------------------------|--------------|
| Formula weight                                      | 497.07                                                                    | 497.07      | 994.14       | 461.09                                                                                 | 461.09       |
| Temperature/K                                       | 300                                                                       | 388         | 413          | 298                                                                                    | 323          |
| Crystal system                                      | triclinic                                                                 | monoclinic  | cubic        | monoclinic                                                                             | cubic        |
| Space group                                         | $P\bar{1}$                                                                | $C_2/c$     | $Fm\bar{3}m$ | $P2_1/c$                                                                               | $Fm\bar{3}m$ |
| <i>a</i> /Å                                         | 8.29732(17)                                                               | 15.1525(8)  | 12.2916(5)   | 14.3722(10)                                                                            | 12.2181(7)   |
| <i>b</i> /Å                                         | 8.5989(2)                                                                 | 8.2653(3)   | 12.2916(5)   | 8.6742(4)                                                                              | 12.2181(7)   |
| <i>c</i> /Å                                         | 15.0572(3)                                                                | 15.3801(5)  | 12.2916(5)   | 15.0692(8)                                                                             | 12.2181(7)   |
| $\alpha$ /°                                         | 105.1112(19)                                                              | 90          | 90           | 90                                                                                     | 90           |
| $\beta$ /°                                          | 90.3127(16)                                                               | 107.358(4)  | 90           | 109.484(7)                                                                             | 90           |
| $\gamma$ /°                                         | 118.838(2)                                                                | 90          | 90           | 90                                                                                     | 90           |
| Volume/Å <sup>3</sup>                               | 897.53(4)                                                                 | 1838.48(14) | 1857.1(2)    | 1771.05(19)                                                                            | 1823.9(3)    |
| <i>Z</i>                                            | 2                                                                         | 4           | 2            | 4                                                                                      | 4            |
| $\mu$ /mm <sup>-1</sup>                             | 2.869                                                                     | 2.802       | 2.774        | 22.692                                                                                 | 22.034       |
| $\rho_{calc}$ /g · cm <sup>-3</sup>                 | 1.839                                                                     | 1.796       | 1.778        | 1.729                                                                                  | 1.679        |
| <i>R</i> <sub>int</sub>                             | 0.0151                                                                    | 0.0280      | 0.0098       | 0.0799                                                                                 | 0.0567       |
| <i>R</i> <sub>1</sub> [ <i>I</i> ≥ 2σ( <i>I</i> )]  | 0.0211                                                                    | 0.0342      | 0.0317       | 0.0881                                                                                 | 0.0404       |
| <i>wR</i> <sub>2</sub> [ <i>I</i> ≥ 2σ( <i>I</i> )] | 0.0557                                                                    | 0.1012      | 0.0919       | 0.2189                                                                                 | 0.1179       |
| <i>R</i> <sub>1</sub> [all data]                    | 0.0229                                                                    | 0.0369      | 0.0344       | 0.1206                                                                                 | 0.0421       |
| <i>wR</i> <sub>2</sub> [all data]                   | 0.0567                                                                    | 0.1100      | 0.0976       | 0.2475                                                                                 | 0.1191       |
| Goodness-of-fit on <i>F</i> <sup>2</sup>            | 1.033                                                                     | 1.139       | 0.976        | 1.072                                                                                  | 1.125        |

**Table S9.** Selected bond lengths [Å] for FAZT-Cs and AZT-Cs.

| Phase          | Fe-C       | Cs-N       | C-N       |
|----------------|------------|------------|-----------|
| LTP in FAZT-Cs | 1.9364(18) | 3.2725(18) | 1.146(2)  |
|                | 1.9435(18) | 3.3096(19) | 1.150(2)  |
|                | 1.9423(19) | 3.3260(18) | 1.150(3)  |
|                | 1.9423(19) | 3.2894(19) | 1.142(3)  |
|                | 1.9398(19) | 3.1142(19) | 1.143(3)  |
|                | 1.9398(19) | 3.1240(19) | 1.147(2)  |
| ITP in FAZT-Cs | 1.944(3)   | 3.303(3)   | 1.134(4)  |
|                | 1.944(3)   | 3.303(3)   | 1.139(4)  |
|                | 1.935(3)   | 3.140(9)   | 1.157(9)  |
|                | 1.935(3)   | 3.140(10)  |           |
|                | 1.935(3)   | 3.228(3)   | 1.15(3)   |
|                | 1.935(3)   | 3.228(3)   |           |
| HTP in FAZT-Cs | 1.904(8)   | 3.177(11)  | 1.209(15) |
| LTP in AZT-Cs  | 1.942(9)   | 3.141(8)   | 1.147(11) |
|                | 1.942(9)   | 3.175(8)   | 1.145(11) |
|                | 1.946(8)   | 3.203(9)   | 1.142(13) |
|                | 1.936(9)   | 3.240(8)   | 1.154(11) |
|                | 1.945(10)  | 3.138(11)  | 1.141(11) |
|                | 1.945(10)  | 3.214(8)   | 1.149(14) |
| HTP in AZT-Cs  | 1.893(17)  | 3.15(2)    | 1.24(3)   |

**Table S10.** Selected bond angles [°] for FAZT-Cs and AZT-Cs.

| Phase              | C-Fe-C    |           | N-Cs-N     |            | Cs-N-C     | N-C-Fe     |
|--------------------|-----------|-----------|------------|------------|------------|------------|
| LTP in<br>FAZT-Cs  | 91.25(8)  | 90.25(9)  | 85.93(5)   | 99.22(6)   | 137.89(15) | 175.84(17) |
|                    | 88.75(8)  | 89.75(8)  | 81.32(5)   | 89.46(6)   | 144.06(17) | 177.95(19) |
|                    | 91.25(8)  | 93.10(8)  | 109.88(5)  | 87.12(7)   | 140.39(16) | 178.6(2)   |
|                    | 88.75(8)  | 86.90(8)  | 83.06(5)   | 82.37(6)   | 142.71(17) | 175.56(18) |
|                    | 90.25(9)  | 93.10(8)  | 127.75(5)  | 74.84(6)   | 167.27(19) | 176.92(17) |
|                    | 89.75(9)  | 86.90(8)  | 69.74(6)   | 77.84(6)   | 161.8(2)   | 177.8(2)   |
| ITP in<br>FAZT-Cs  | 89.40(12) | 93.10(12) | 128.62(14) | 104.66(12) | 140.5(3)   | 175.2(3)   |
|                    | 90.60(12) | 86.90(12) | 80.6(7)    | 71.6(7)    |            |            |
|                    | 89.40(12) | 88.38(14) | 80.6(7)    | 71.6(7)    | 152.2(4)   | 171.7(13)  |
|                    | 90.60(12) | 91.62(14) | 83.1(6)    | 87.5(7)    |            |            |
|                    | 86.90(12) | 88.37(14) | 104.66(12) | 87.5(7)    | 140(3)     | 175.3(4)   |
|                    | 93.10(12) | 91.63(14) | 86.77(11)  | 75.4(14)   | 172.4(9)   | 161(2)     |
| HTP in<br>FAZT- Cs | 90.000(2) |           | 91.39(15)  | 72.1(10)   | 146.9(17)  | 155.8(12)  |
|                    |           |           | 88.61(15)  | 107.9(10)  |            |            |
|                    |           |           | 81.2(5)    | 98.8(5)    |            |            |
| LTP in<br>AZT- Cs  | 91.9(4)   | 91.7(4)   | 112.2(2)   | 65.8(2)    | 144.8(8)   | 177.6(8)   |
|                    | 91.9(4)   | 91.7(4)   | 103.5(3)   | 100.8(3)   | 136.0(8)   | 179.0(10)  |
|                    | 88.1(4)   | 89.0(4)   | 85.6(2)    | 82.7(3)    | 150.5(8)   | 177.0(8)   |
|                    | 88.1(4)   | 89.0(4)   | 76.8(2)    | 105.9(3)   | 165.4(10)  | 178.6(9)   |
|                    | 88.3(4)   | 91.0(4)   | 88.3(2)    | 96.2(3)    | 150.2(8)   | 172.9(9)   |
|                    | 88.3(4)   | 91.0(4)   | 88.6(2)    | 71.4(2)    | 152.3(8)   | 175.4(9)   |
| HTP in<br>AZT- Cs  | 90.0      |           | 91.6(3)    | 90.000(3)  | 145(3)     | 154(2)     |
|                    |           |           | 109.5(17)  | 80.4(8)    |            |            |
|                    |           |           | 88.4(3)    | 99.6(8)    |            |            |

**References:**

1. X. Zhang, X.-D. Shao, S.-C. Li, Y. Cai, Y.-F. Yao, R.-G. Xiong and W. Zhang, *Chem. Commun.*, 2015, **51**, 4568-4571.
2. R.-G. Qiu, X.-X. Chen, R.-K. Huang, D.-D. Zhou, W.-J. Xu, W.-X. Zhang and X.-M. Chen, *Chem. Commun.*, 2020, **56**, 5488-5491.

3. M. Rok, G. Bator, B. Zarychta, B. Dziuk, D. K. Skalecki, W. Medycki and M. Zamponi, *Cryst. Growth Des.*, 2019, **19**, 4526-4537.
4. W.-J. Xu, K.-P. Xie, Z.-F. Xiao, W.-X. Zhang and X.-M. Chen, *Cryst. Growth Des.*, 2016, **16**, 7212-7217.
5. M. Rok, M. Moskwa, M. Działowa, A. Bieńko, C. Rajnák, R. Boča and G. Bator, *Dalton Trans.*, 2019, **48**, 16650-16660.
6. M. Rok, B. Zarychta, M. Moskwa, B. Dziuk, W. Medycki and G. Bator, *Dalton Trans.*, 2020, **49**, 1830-1838.
7. X. Liu, L. Li, Y.-Z. Yang and K.-L. Huang, *Dalton Trans.*, 2014, **43**, 4086-4092.
8. W.-J. Xu, S.-L. Chen, Z.-T. Hu, R.-B. Lin, Y.-J. Su, W.-X. Zhang and X.-M. Chen, *Dalton Trans.*, 2016, **45**, 4224-4229.
9. M. Rok, J. K. Prytys, V. Kinzhybalov and G. Bator, *Dalton Trans.*, 2017, **46**, 2322-2331.
10. Y.-X. Li, X.-L. Wang, Y. Li, O. Sato, Z.-S. Yao and J. Tao, *Inorg. Chem.*, 2020, **60**, 380-386.
11. C. Shi, X.-B. Han, Y. Wang and W. Zhang, *Inorg. Chem. Front.*, 2016, **3**, 1604-1608.
12. W.-J. Xu, K. Romanyuk, J. M. G. Martinho, Y. Zeng, X.-W. Zhang, A. Ushakov, V. Shur, W.-X. Zhang, X.-M. Chen, A. Kholkin and J. Rocha, *J. Am. Chem. Soc.*, 2020, **142**, 16990-16998.
13. W. Zhang, H.-Y. Ye, R. Graf, H. W. Spiess, Y.-F. Yao, R.-Q. Zhu and R.-G. Xiong, *J. Am. Chem. Soc.*, 2013, **135**, 5230-5233.
14. W.-J. Xu, P.-F. Li, Y.-Y. Tang, W.-X. Zhang, R.-G. Xiong and X.-M. Chen, *J. Am. Chem. Soc.*, 2017, **139**, 6369-6375.
15. M. Rok, A. Ciżman, B. Zarychta, J. K. Zaręba, M. Trzebiatowska, M. Mączka, A. Stroppa, S. Yuan, A. E. Phillips and G. Bator, *J. Mater. Chem. C*, 2020, **8**, 17491-17501.
16. Z.-X. Gong, Q.-W. Wang, J.-J. Ma, J.-Y. Jiang, D.-Y. E, Z.-Q. Li, F.-W. Qi and H. Liang, *Mat. Chem. Front.*, 2020, **4**, 918-923.
